# Supplementary material for: Chemical profile and pancreatic lipase inhibitory activity of Sinobambusa tootsik (Sieb.) Makino leaves
Source: PeerJ. 2019 Sep 23;7:e7765. doi: 10.7717/peerj.7765 (PMC6761919; doi:10.7717/peerj.7765)
Supplement: Supplemental Information 1 [file peerj-07-7765-s001.xlsx]

## Sheet: Absorbance 
Detection result
tangzhu-ceyang -20.19.04.11
2019/4/11 10:35:28
Absorbance 1
Wavelength: 405 nm
plate 1
	S. tootsik Concentration(mg/ml)	1.25mg/ml			1.125mg/ml			1mg/ml			0.75mg/ml			0.5mg/ml			0.375mg/ml			Blank
read	time [s]	(A10)	(A11)	(A12)	(B10)	(B11)	(B12)	(C10)	(C11)	(C12)	(D10)	(D11)	(D12)	(E10)	(E11)	(E12)	(F10)	(F11)	(F12)	(F04)	(F05)	(F06)
1	0	3.1428	3.3711	3.2341	2.7642	3.133	3.0814	2.5558	2.7459	2.8404	2.0592	2.2485	2.2383	1.627	1.6379	1.634	1.3662	1.487	1.4126	0.3872	0.3808	0.3986
2	1	3.1656	3.3762	3.25186	2.76888	3.133	3.0815	2.56039	2.7556	2.8402	2.0652	2.258	2.2441	1.6375	1.6463	1.6524	1.3683	1.5034	1.424	0.4043	0.4063	0.4061
3	2	3.1652	3.3781	3.25706	2.77542	3.1253	3.0805	2.56129	2.7602	2.8459	2.0734	2.2566	2.2534	1.6491	1.6595	1.6549	1.3712	1.5101	1.4352	0.419	0.4204	0.4188
4	3	3.1732	3.3453	3.25662	2.78472	3.1304	3.0873	2.56804	2.7646	2.8317	2.0835	2.2595	2.2584	1.6655	1.6693	1.6614	1.3781	1.5184	1.4449	0.442	0.4287	0.4268
5	4	3.1613	3.3612	3.2637	2.784	3.1206	3.0887	2.5702	2.768	2.8365	2.0819	2.2676	2.2678	1.6727	1.6803	1.6651	1.3887	1.5299	1.4507	0.4506	0.4491	0.4426
6	5	3.1409	3.3743	3.26446	2.79402	3.1323	3.0976	2.57254	2.772	2.8425	2.103	2.2671	2.2743	1.6782	1.6918	1.6753	1.3976	1.5384	1.4612	0.4703	0.4637	0.4573
7	6	3.1682	3.3853	3.26602	2.79486	3.1306	3.0923	2.58145	2.7792	2.8307	2.1045	2.2748	2.277	1.6866	1.7016	1.6804	1.4115	1.5466	1.4759	0.4835	0.478	0.4659
8	7	3.1648	3.3869	3.2731	2.80278	3.1326	3.1063	2.58847	2.7846	2.8407	2.1074	2.2843	2.2849	1.702	1.7103	1.6854	1.4215	1.5565	1.4841	0.4962	0.4934	0.4807
9	8	3.1627	3.3694	3.26922	2.81316	3.1386	3.1023	2.58955	2.7873	2.8304	2.1122	2.287	2.2931	1.707	1.723	1.6937	1.4346	1.5674	1.4912	0.5109	0.5059	0.495
10	9	3.1602	3.3916	3.27354	2.81556	3.1311	3.0913	2.59612	2.7991	2.8435	2.1271	2.2956	2.3033	1.7182	1.7312	1.7022	1.4446	1.5785	1.5059	0.5209	0.522	0.5052
11	10	3.1905	3.3871	3.28778	2.8146	3.1478	3.1087	2.60404	2.8044	2.8445	2.1335	2.3046	2.3139	1.73	1.7397	1.719	1.4543	1.5922	1.5128	0.5358	0.5294	0.5138
12	11	3.1614	3.3887	3.28834	2.82168	3.1323	3.1012	2.61457	2.8096	2.8539	2.1481	2.3153	2.3303	1.74	1.7506	1.7272	1.4663	1.5998	1.5258	0.5508	0.5419	0.5302
13	12	3.1895	3.3973	3.28994	2.82354	3.1417	3.1214	2.62825	2.814	2.858	2.1593	2.3257	2.3364	1.7495	1.7616	1.7371	1.4767	1.6162	1.5378	0.5707	0.5679	0.5468
14	13	3.1959	3.3822	3.29862	2.82228	3.134	3.1172	2.635	2.8331	2.864	2.167	2.3314	2.3488	1.7582	1.7706	1.7554	1.4901	1.6231	1.5491	0.5881	0.5729	0.5575
15	14	3.1904	3.4076	3.29594	2.83128	3.1453	3.1178	2.64103	2.8433	2.8667	2.1771	2.341	2.3597	1.7693	1.7818	1.7654	1.5034	1.6377	1.5645	0.6001	0.5846	0.5689
16	15	3.1944	3.3942	3.30558	2.8344	3.1477	3.1307	2.64337	2.8416	2.8706	2.1879	2.3582	2.3712	1.7809	1.7932	1.7797	1.5155	1.6422	1.5718	0.6076	0.5977	0.5731
17	16	3.2118	3.4264	3.30974	2.84196	3.1499	3.136	2.65957	2.8501	2.8776	2.1981	2.3577	2.3779	1.7905	1.8042	1.7848	1.5264	1.6548	1.5826	0.6209	0.6107	0.5826
18	17	3.2075	3.4571	3.31486	2.8413	3.1536	3.136	2.66254	2.8616	2.8814	2.2102	2.3705	2.3871	1.8017	1.8159	1.7977	1.5398	1.6673	1.5968	0.6357	0.6231	0.5944
19	18	3.2139	3.4396	3.31886	2.84856	3.1671	3.152	2.67127	2.8693	2.894	2.2206	2.3807	2.3935	1.8156	1.8254	1.8142	1.553	1.6734	1.605	0.6514	0.6341	0.61
20	19	3.2243	3.4564	3.32618	2.85252	3.1668	3.1573	2.68045	2.8754	2.8941	2.2344	2.3901	2.4081	1.8279	1.8405	1.8203	1.5693	1.6865	1.6202	0.6639	0.6729	0.6229
21	20	3.2282	3.4695	3.31338	2.86146	3.1741	3.164	2.68738	2.8816	2.911	2.2411	2.4029	2.4123	1.8383	1.8516	1.8332	1.5789	1.6948	1.6299	0.6705	0.6577	0.6339
	Slope	0.0037	0.0047	0.00404	0.0046	0.005	0.004	0.0065	0.0069	0.0051	0.0092	0.0078	0.0091	0.0103	0.0105	0.0099	0.0112	0.0104	0.0109	0.0143	0.0139	0.0119
